# Supplementary material for: Air Trapping Mechanism in Artificial Salvinia-Like Micro-Hairs Fabricated via Direct Laser Lithography
Source: MDPI journal article supplement (doi:10.3390/mi8120366), 2017-12-20
Supplement: s1 [file s1]

# Supplementary Materials: Air trapping mechanism in artificial Salvinia-like micro-hairs fabricated via direct laser lithography

Omar Tricinci, Tercio Terencio, Nicola M. Pugno, Francesco Greco, Barbara Mazzolai and Virgilio Mattoli

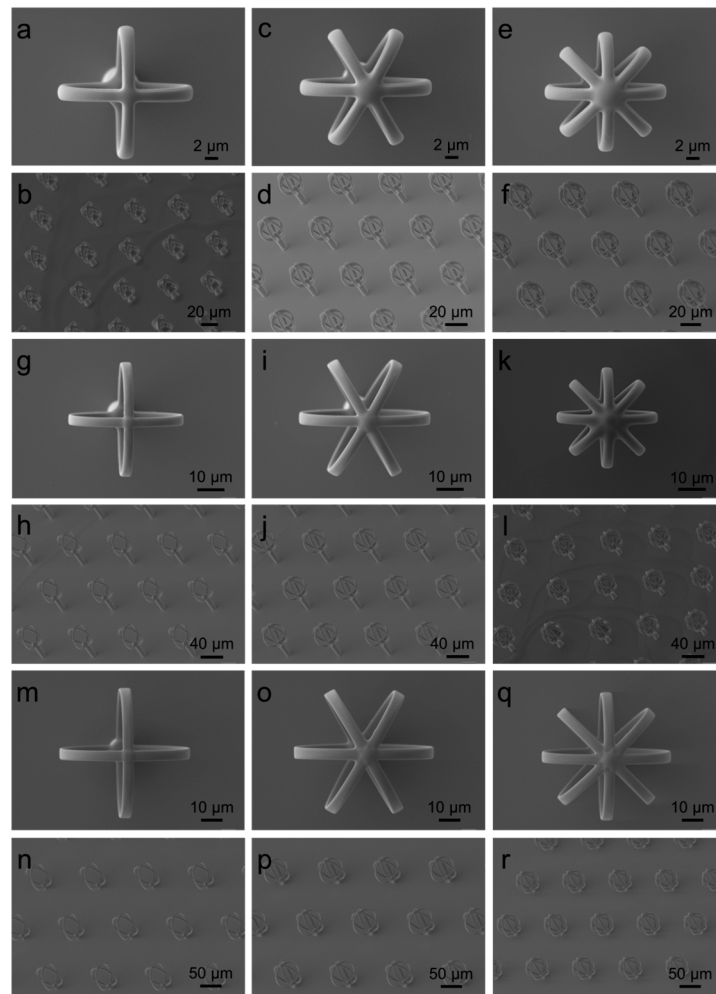

**Figure S1.** SEM images of design 1 (a,b); 2 (c,d); 3(e,f); 7 (g,h); 8 (i,j); 9 (k,l); 13 (m,n); 14 (o,p); 15 (q,r). Designs refers to table in Figure 1d.

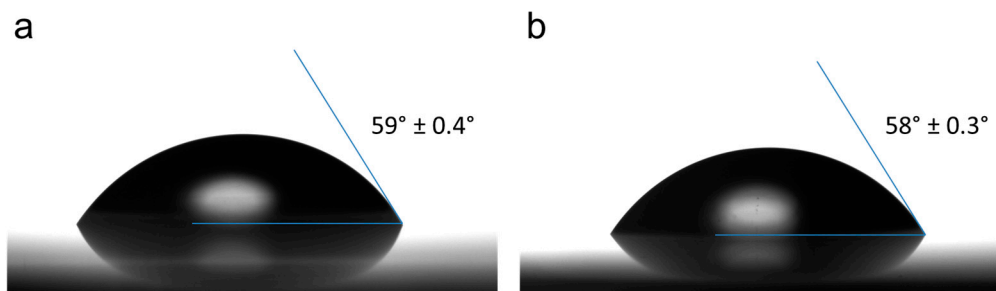

**Figure S2.** (a) Static contact angle of water on flat SU-8; (b) Static contact angle of water with 5(6)-TRITC ( $0.01 \text{ mg}\cdot\text{mL}^{-1}$ ) on flat SU-8.

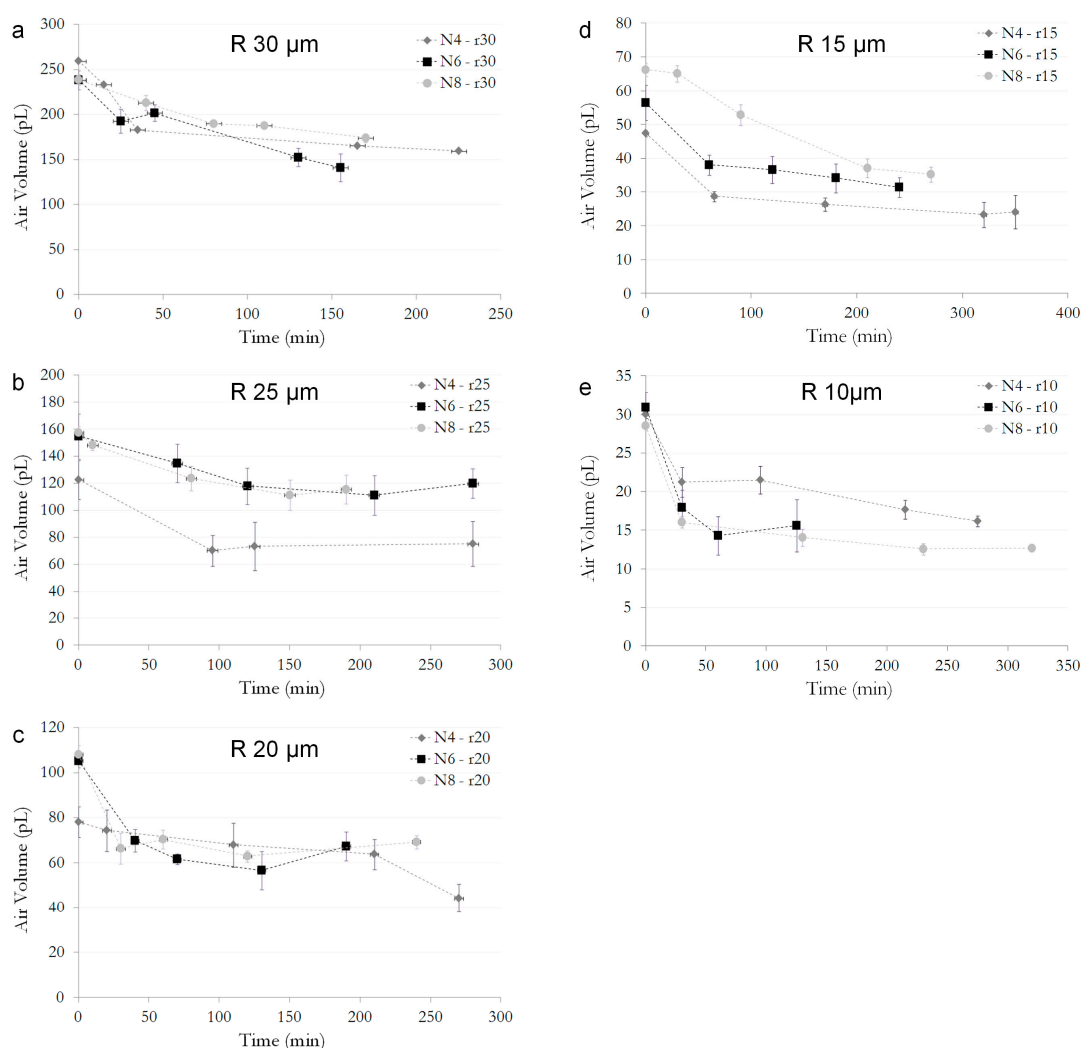

**Figure S3.** (a–e) Results of the dynamics of the variation of the air volumes trapped in the salvinia-like structures for all the tested designs (see Figure 1d), grouped for crown-like radius heads.  $N$  represents the number of filaments composing the crown-like heads while  $R$  is the radius of the heads.

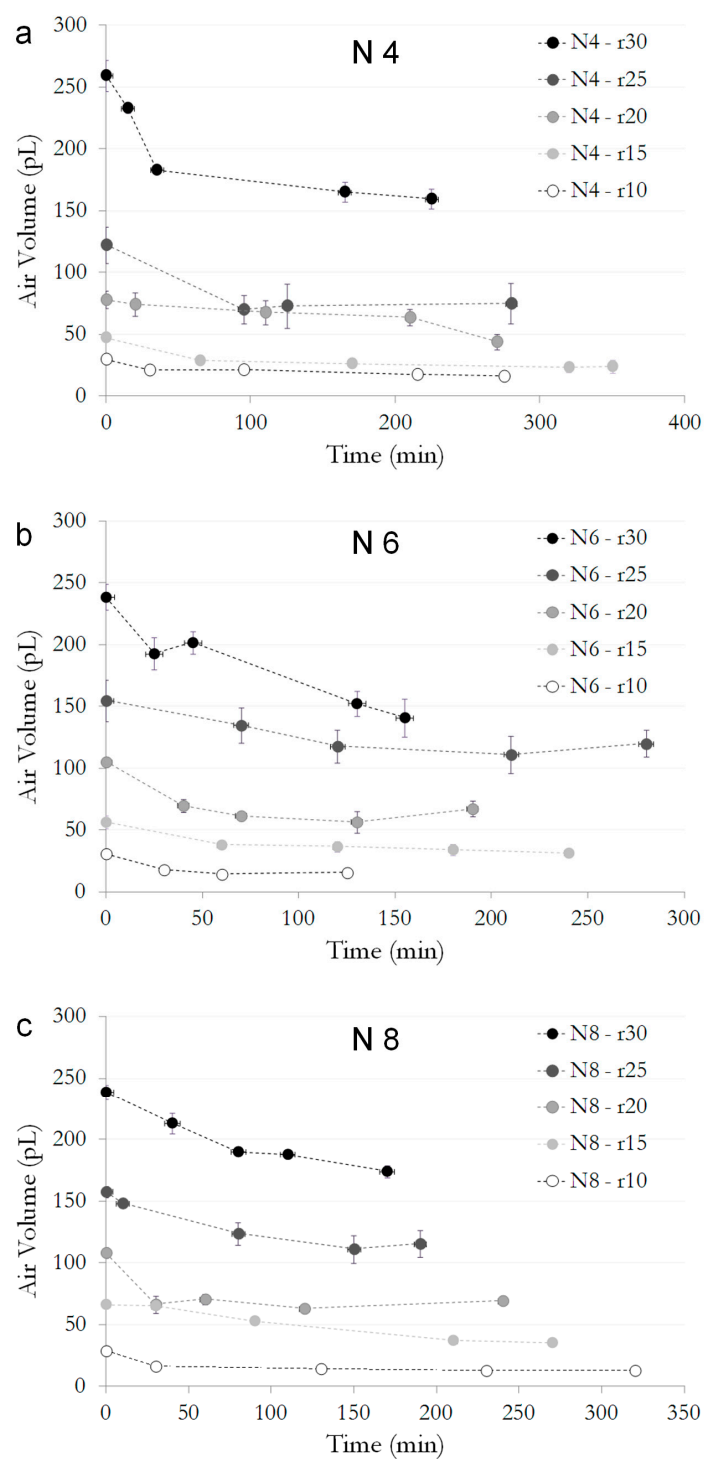

**Figure S4.** (a–c) Results of the dynamics of the variation of the air volumes trapped in the salvinia-like structures for all the tested designs (see Figure 1d), grouped for number of crown-like heads filaments.  $N$  represents the number of filaments composing the crown-like heads while  $R$  is the radius of the heads.
